# Supplementary material
Source: Springer Nature journal article supplement (https://www.springermedizin.de/resource/supplementary/13058_2011_2873_MOESM1_ESM.pdf/9702762)

## A. HER2 Binding

### MGAH22 vs. RES120

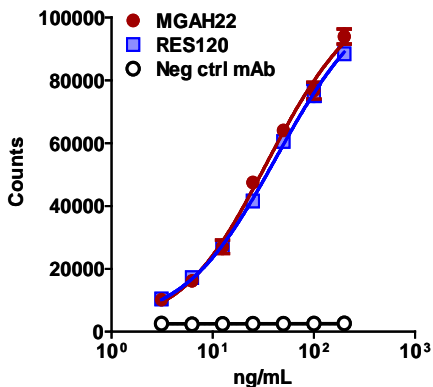

### MGAH22 vs. trastuzumab

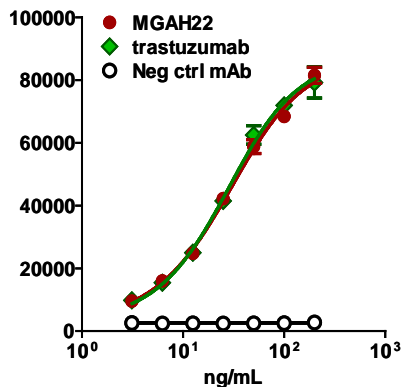

## B. Proliferation

### JIMT-1

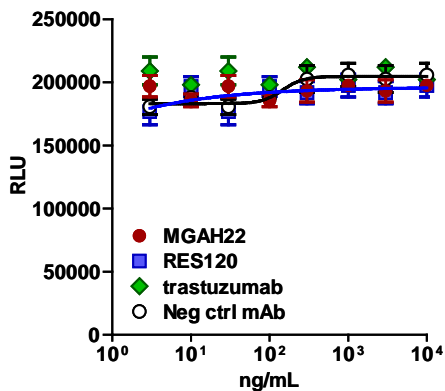

### SKBR-3

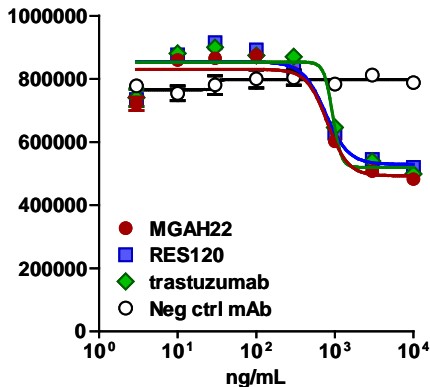

Supplement: MOESM1 [file 9702762]
